# Supplementary material
Source: publisher site journal article supplement (https://www.dovepress.com/get_supplementary_file.php?f=284555.docx)
Supplement: Supplementary file 1 [file get_supplementary_file.php]

| **Supplementary material**    Table S1: General knowledge quiz | | | |
| --- | --- | --- | --- |
| Statements | True | False | Do not know |
| Fibromyalgia is characterized by widespread musculoskeletal pain. | 104 (88.1%) | 5 (4.2%) | 9 (7.6%) |
| Fibromyalgia is an inflammatory joint disease. | 19 (16.1%) | 87 (73.7%) | 12 (10.2%) |
| Fibromyalgia is an objectively defined condition (i.e., not a diagnosis of exclusion). | 44 (37.3%) | 34 (28.8%) | 40 (33.9%) |
| Fibromyalgia is seen equally in females and males. | 23 (19.5%) | 67 (56.8%) | 28 (23.7%) |
| Fibromyalgia causes deformities in joints. | 22 (18.6%) | 78 (66.1%) | 18 (15.3%) |
| Fibromyalgia may cause forgetfulness and difficulty concentrating. | 62 (52.5%) | 24 (20.3%) | 32 (27.1%) |
| Fibromyalgia is a disease that can be cured completely. | 22 (18.6%) | 56 (47.5%) | 40 (33.9%) |
| Sleep disturbance is common in fibromyalgia. | 94 (79.7%) | 4 (3.4%) | 20 (16.9%) |
| Fibromyalgia is completely psychological. | 16 (13.6%) | 84 (71.2%) | 18 (15.3%) |
| Fibromyalgia affects the individual’s quality of life. | 109 (92.4%) | 3 (2.5%) | 6 (5.1%) |
| Fibromyalgia treatment depends mainly on medications. | 9 (7.6%) | 98 (83.1%) | 11 (9.3%) |
| Lab tests (e.g., muscle biopsy) and imaging are helpful to confirm the diagnosis of Fibromyalgia. | 35 (29.7%) | 44 (37.3%) | 39 (33.1%) |
| Eleven out of 18 tender points are important for a diagnosis of fibromyalgia. | 51 (43.2%) | 13 (11.0%) | 54 (45.8%) |
| Headache is useful for a diagnosis of fibromyalgia. | 40 (33.9%) | 29 (24.6%) | 49 (41.5%) |
| Fatigue is useful for a diagnosis of fibromyalgia. | 90 (76.3%) | 11 (9.3%) | 17 (14.4%) |
| Anxiety and/or depression are useful for a diagnosis of fibromyalgia. | 80 (67.8%) | 20 (16.9%) | 18 (15.3%) |
| Waking up tired (unrefreshed) is useful for a diagnosis of fibromyalgia. | 70 (59.3%) | 21 (17.8%) | 27 (22.9%) |
